# Supplementary material for: In situsurface-trap passivation of CuBi2O4photocathodes for unbiased solar water splitting
Source: Royal Society of Chemistry journal article supplement (doi:10.1039/d2ta07117g), 2022-11-30
Supplement: d2ta07117g1.pdf [file d2ta07117g1.pdf]

## Supporting Information

### ***In situ* surface-trap passivation of CuBi<sub>2</sub>O<sub>4</sub> photocathodes for unbiased solar water splitting**

Yingfei Hu,<sup>ab</sup> Jun Wang,<sup>a</sup> Huiting Huang,<sup>ac</sup> Jianyong Feng,<sup>\*ac</sup> Wangxi Liu,<sup>a</sup> Hangmin Guan,<sup>b</sup> Lingyun Hao,<sup>b</sup> Zhaosheng Li,<sup>\*ac</sup> and Zhigang Zou<sup>a</sup>

<sup>a</sup>Collaborative Innovation Center of Advanced Microstructures, National Laboratory of Solid State Microstructures, School of Physics, Nanjing University, 22 Hankou Road, Nanjing 210093, China

<sup>b</sup>School of Materials Engineering, Jinling Institute of Technology, 99 Hongjing Avenue, Nanjing 211169, China

<sup>c</sup>College of Engineering and Applied Sciences, Nanjing University, Nanjing 210093, China

Corresponding author. E-mail: fengjianyong@nju.edu.cn (Jianyong Feng)

Corresponding author. E-mail: zsli@nju.edu.cn (Zhaosheng Li)

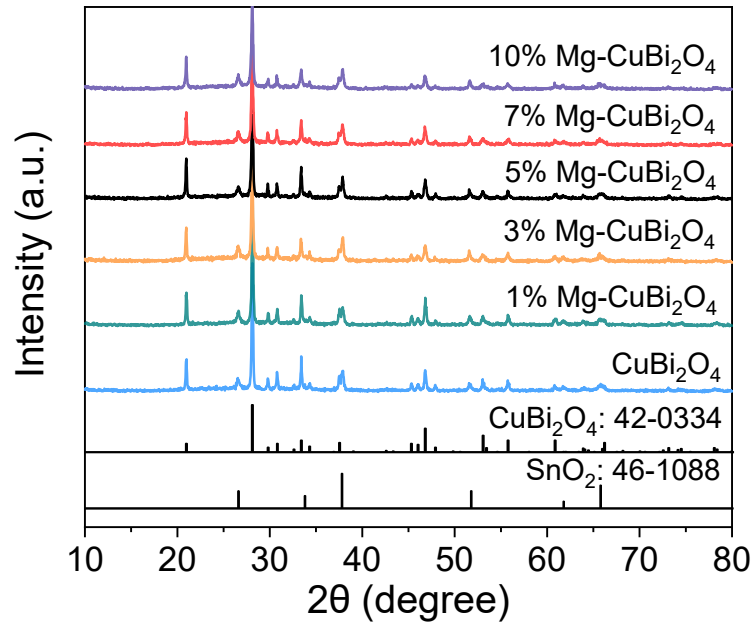

**Figure S1.** XRD patterns of CuBi<sub>2</sub>O<sub>4</sub> films with different amounts of Mg (0, 1%, 3%, 5%, 7%, 10%).

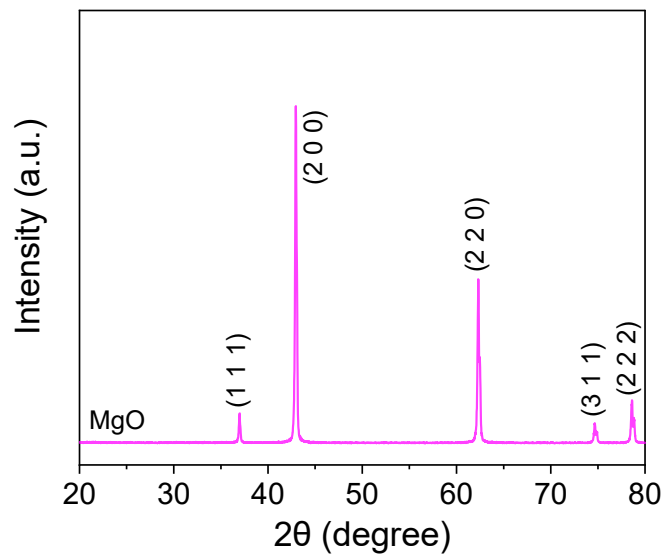

**Figure S2.** XRD pattern of MgO prepared by direct calcination of the magnesium precursor.

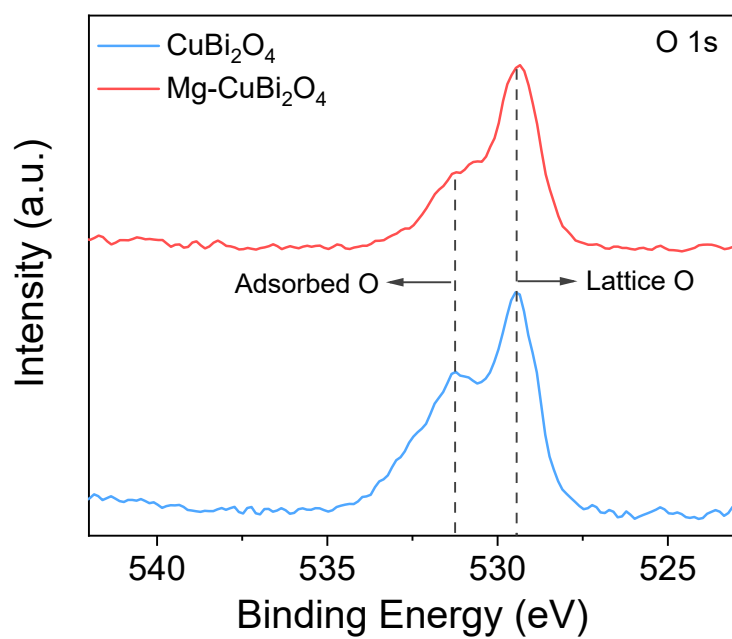

**Figure S3.** XPS spectra of O 1s orbits in  $\text{CuBi}_2\text{O}_4$  and  $\text{Mg-CuBi}_2\text{O}_4$  samples.

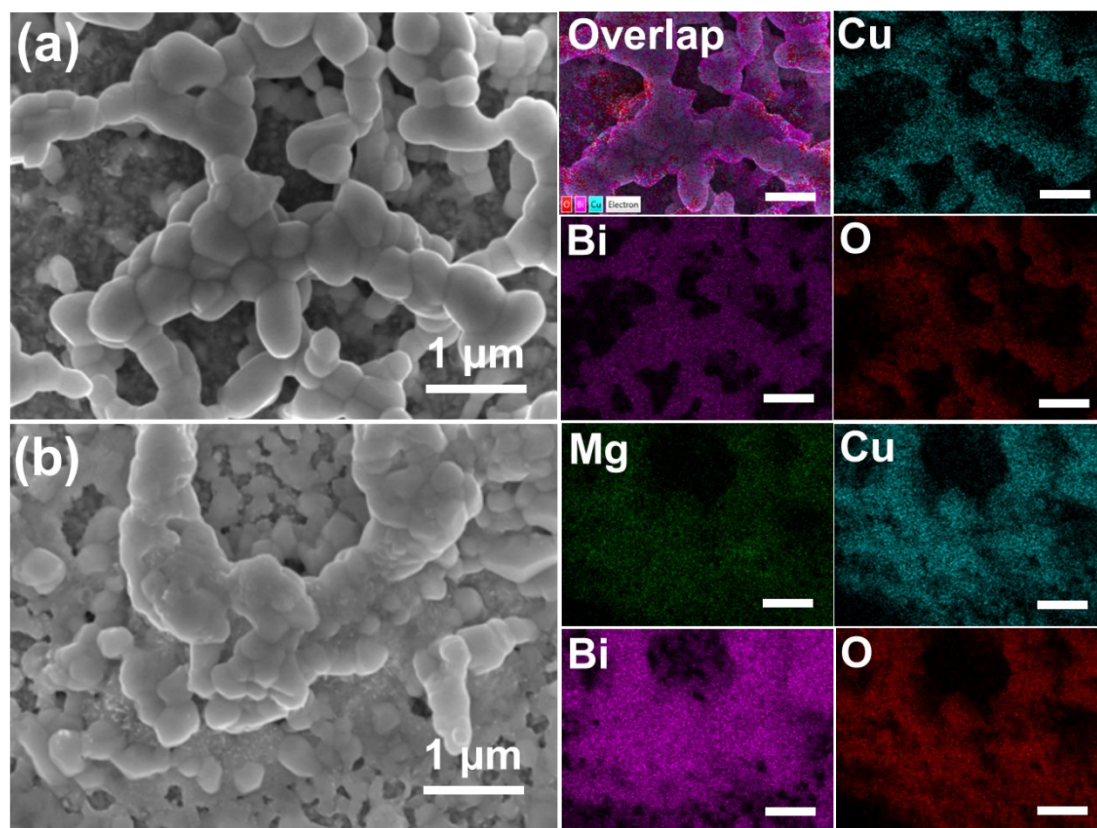

**Figure S4.** SEM images of (a)  $\text{CuBi}_2\text{O}_4$ , (b)  $\text{Mg-CuBi}_2\text{O}_4$  Films and EDS elemental mappings of the  $\text{Mg-CuBi}_2\text{O}_4$  sample.

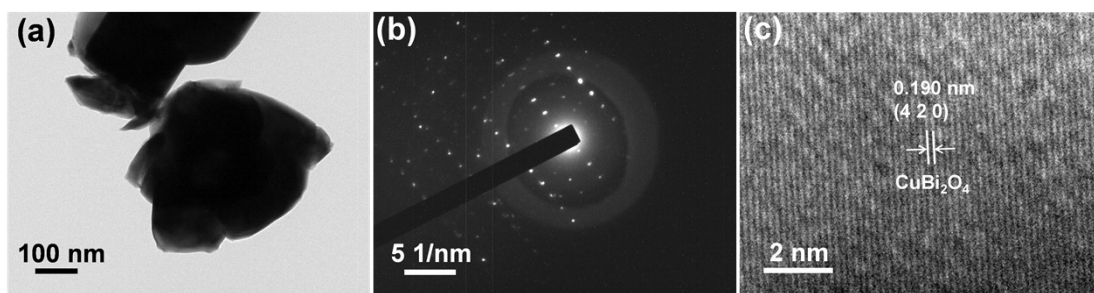

**Figure S5.** (a) TEM, (b) SAED, and (c) HR-TEM images of CuBi<sub>2</sub>O<sub>4</sub>.

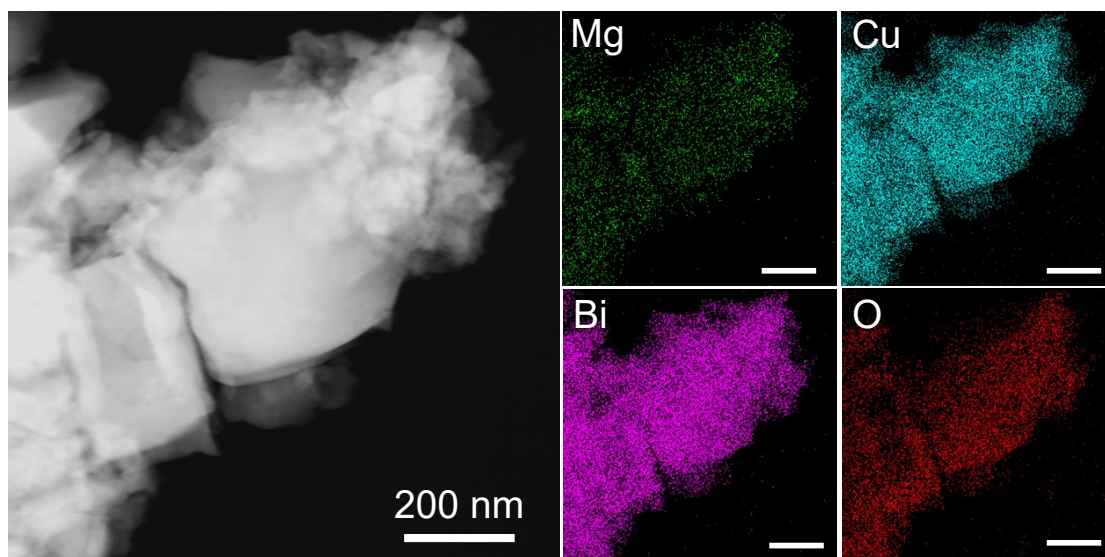

**Figure S6.** TEM image and EDS elemental mappings of the Mg-CuBi<sub>2</sub>O<sub>4</sub> sample (scale bar: 200 nm)

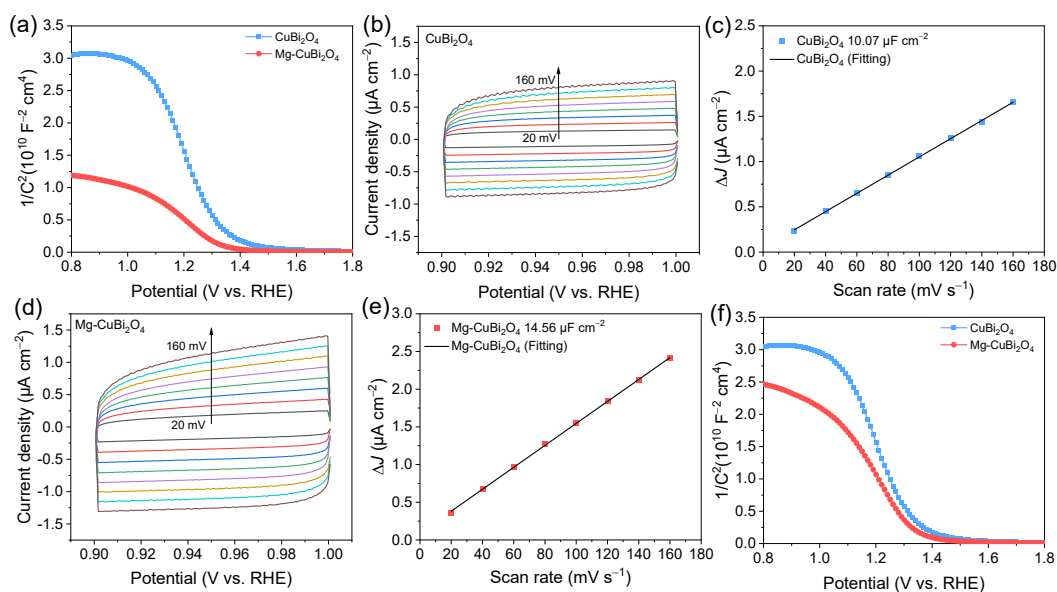

**Figure S7.** (a) Mott–Schottky plots of  $\text{CuBi}_2\text{O}_4$  and  $\text{Mg-CuBi}_2\text{O}_4$  photocathodes. Electrochemically active surface areas (ECSA) measurements: cyclic voltammetry (CV) curves of (b)  $\text{CuBi}_2\text{O}_4$  and (d)  $\text{Mg-CuBi}_2\text{O}_4$  photocathodes by various scan rates (20–160 mV/s); double-layer capacitance ( $C_{dl}$ ) of (c)  $\text{CuBi}_2\text{O}_4$  and (e)  $\text{Mg-CuBi}_2\text{O}_4$  depended by the difference between  $J_a$  and  $J_c$  values. (f) Mott–Schottky plots which have been corrected with ECSA data.

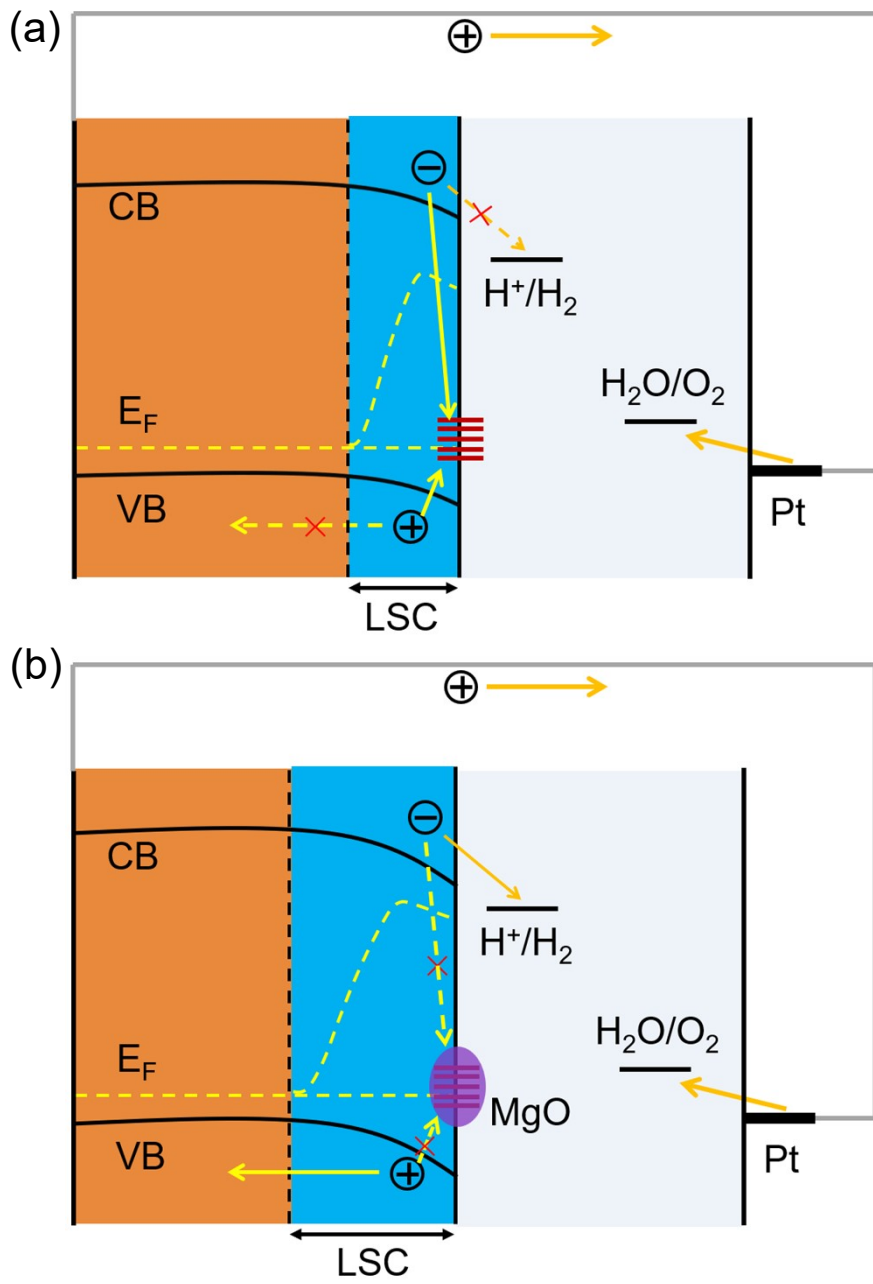

**Figure S8.** Schematic diagrams of the energy band of CuBi<sub>2</sub>O<sub>4</sub> photocathodes: (a) bare CuBi<sub>2</sub>O<sub>4</sub>; (b) Mg-CuBi<sub>2</sub>O<sub>4</sub>.

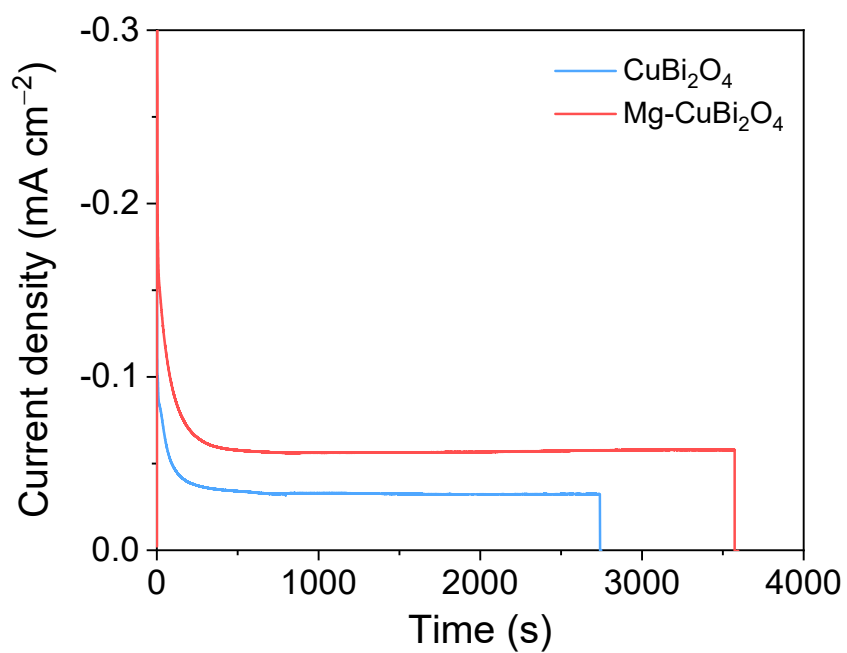

**Figure S9.** I-t curves of  $\text{CuBi}_2\text{O}_4$  and  $\text{Mg-CuBi}_2\text{O}_4$  photocathodes.

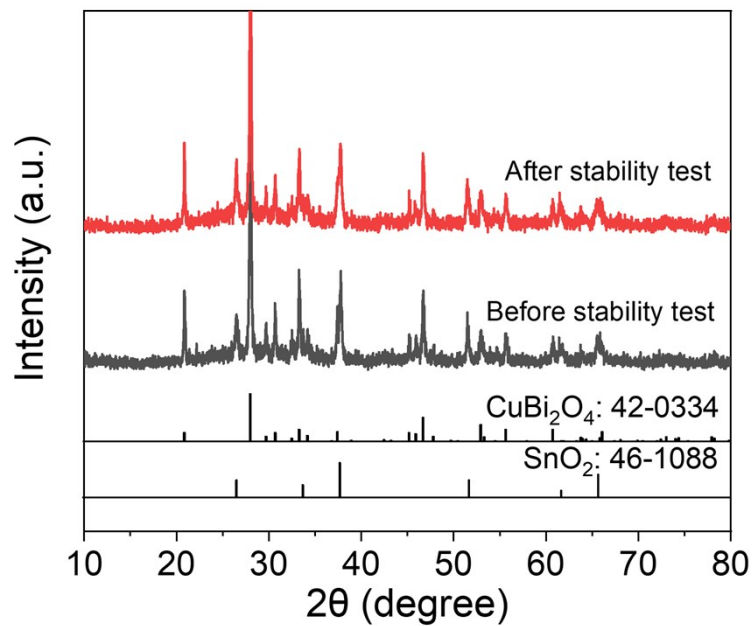

**Figure S10.** XRD patterns of  $\text{Mg-CuBi}_2\text{O}_4$  photocathode before and after stability test.

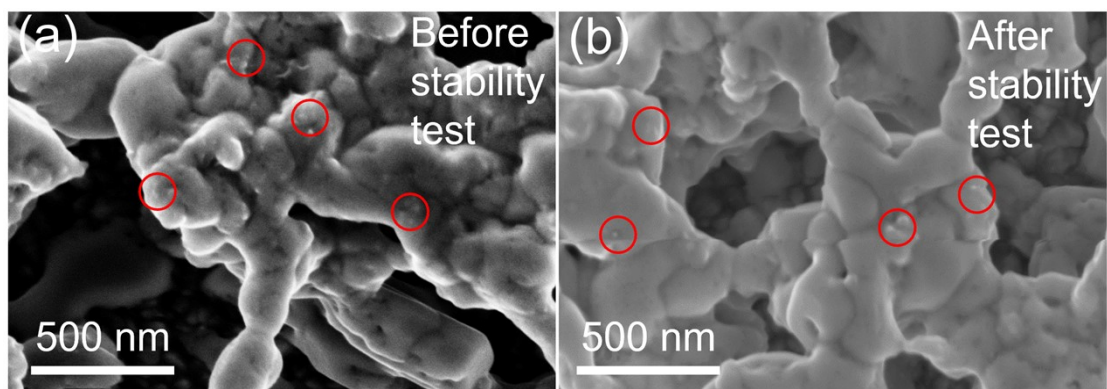

**Figure S11.** SEM images of Mg-CuBi<sub>2</sub>O<sub>4</sub> photocathode before and after stability test. (Several MgO particles are marked by red circles.)

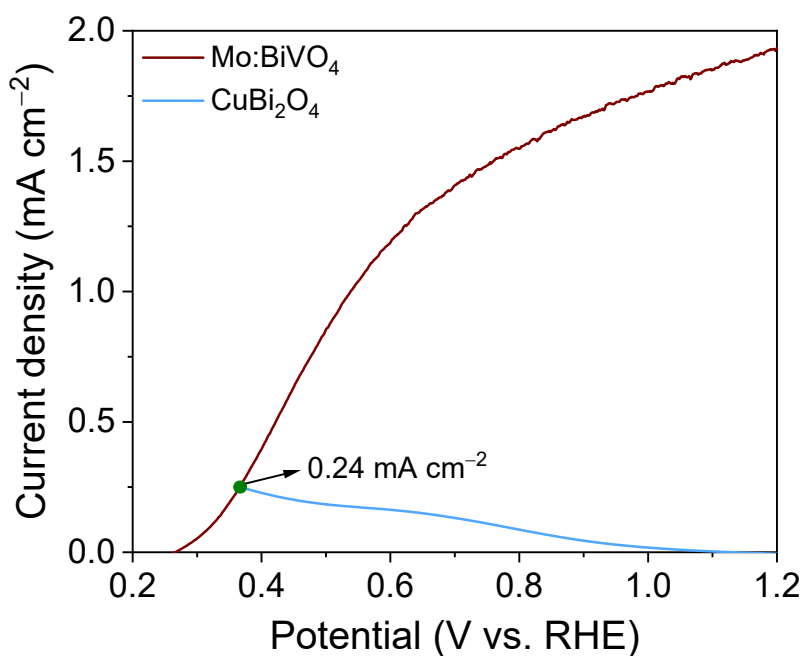

**Figure S12.** *J*-*V* curves of a single Mo:BiVO<sub>4</sub> photoanode and a single CuBi<sub>2</sub>O<sub>4</sub> photocathode.



**Table S1.** Summary of various CuBi<sub>2</sub>O<sub>4</sub> photocathodes for PEC water reduction.

| Photocathode structure                                                                    | Electrolyte                                                                                                        | Onset potential       | Photocurrent                                                                               | Ref.      |
|-------------------------------------------------------------------------------------------|--------------------------------------------------------------------------------------------------------------------|-----------------------|--------------------------------------------------------------------------------------------|-----------|
| FTO/CuBi <sub>2</sub> O <sub>4</sub> /TiO <sub>2</sub> /Pt                                | 0.1 M NaOH                                                                                                         | 1.2 V <sub>RHE</sub>  | -0.35 mA·cm <sup>-2</sup><br>at 0.6 V <sub>RHE</sub>                                       | 1         |
| FTO/Ag- CuBi <sub>2</sub> O <sub>4</sub><br>SMRs/NGQDs                                    | 0.5 M Na <sub>2</sub> SO <sub>4</sub> ; pH=6.6                                                                     | 1.05 V <sub>RHE</sub> | -0.071 mA·cm <sup>-2</sup><br>at 0.3 V <sub>RHE</sub>                                      | 2         |
| FTO/CuBi <sub>2</sub> O <sub>4</sub> (Rapid thermal processing)                           | 0.3 M K <sub>2</sub> SO <sub>4</sub> /0.2 M phosphate buffer solution; pH=7                                        | 1.2 V <sub>RHE</sub>  | -0.38 mA·cm <sup>-2</sup><br>at 0.6 V <sub>RHE</sub> (with H <sub>2</sub> O <sub>2</sub> ) | 3         |
| FTO/O <sub>v</sub> /CuBi <sub>2</sub> O <sub>4</sub> /Zn-CuBi <sub>2</sub> O <sub>4</sub> | 0.3 M K <sub>2</sub> SO <sub>4</sub> /0.2 M phosphate buffer solution; pH=6.65                                     | 1.0 V <sub>RHE</sub>  | -0.6 mA·cm <sup>-2</sup><br>at 0.3 V <sub>RHE</sub>                                        | 4         |
| FTO/CuO/CuBi <sub>2</sub> O <sub>4</sub>                                                  | 0.5 M Na <sub>2</sub> SO <sub>4</sub> ; pH = 7                                                                     | 1.0 V <sub>RHE</sub>  | -0.9 mA·cm <sup>-2</sup><br>at 0.1 V <sub>RHE</sub>                                        | 5         |
| FTO/CuO/CuBi <sub>2</sub> O <sub>4</sub>                                                  | 0.1 M NaOH; pH=13                                                                                                  | 1.12 V <sub>RHE</sub> | -1.49 mA·cm <sup>-2</sup><br>at 0.6 V <sub>SHE</sub>                                       | 6         |
| FTO/CuBi <sub>2</sub> O <sub>4</sub> /Pt                                                  | 0.2 M K <sub>2</sub> HPO <sub>4</sub> /0.2 M KH <sub>2</sub> PO <sub>4</sub> /0.3 M K <sub>2</sub> SO <sub>4</sub> | 1.0 V <sub>RHE</sub>  | -0.5 mA·cm <sup>-2</sup><br>at 0.4 V <sub>RHE</sub>                                        | 7         |
| FTO/nanoCuBi <sub>2</sub> O <sub>4</sub>                                                  | 0.1 M NaOH                                                                                                         | 1.05 V <sub>SHE</sub> | -0.23 mA·cm <sup>-2</sup><br>at 0.4 V <sub>SHE</sub>                                       | 8         |
| FTO/Mg-CuBi <sub>2</sub> O <sub>4</sub>                                                   | KB <sub>i</sub> (KOH: 0.2 M; H <sub>3</sub> BO <sub>3</sub> : 0.4 M); pH=9.2                                       | 1.15 V <sub>RHE</sub> | -0.2 mA·cm <sup>-2</sup><br>at 0.7 V <sub>RHE</sub>                                        | This work |

**Table S2.** Comparison of CuBi<sub>2</sub>O<sub>4</sub> and other photocathodes for PEC water reduction.

| Photocathode structure                                                                   | Electrolyte                                                                                | Onset potential       | Photocurrent                                         | Ref.      |
|------------------------------------------------------------------------------------------|--------------------------------------------------------------------------------------------|-----------------------|------------------------------------------------------|-----------|
| MoS <sub>2</sub> -n <sup>+</sup> p Si                                                    | 0.5 M H <sub>2</sub> SO <sub>4</sub> ; pH=0                                                | 0.35 V <sub>RHE</sub> | -17 mA·cm <sup>-2</sup><br>at 0 V <sub>RHE</sub>     | 9         |
| FTO/Cu <sub>2</sub> O/Ga <sub>2</sub> O <sub>3</sub> /TiO <sub>2</sub> /RuO <sub>x</sub> | 0.5 M Na <sub>2</sub> SO <sub>4</sub> /0.2 M phosphate solution; pH=5                      | 1.0 V <sub>RHE</sub>  | -10 mA·cm <sup>-2</sup><br>at 0 V <sub>RHE</sub>     | 10        |
| FTO/CuO/Pd                                                                               | 0.2 M H <sub>2</sub> BO <sub>3</sub> <sup>-</sup> /H <sub>3</sub> BO <sub>3</sub> ; pH=9.2 | 0.1 V <sub>SCE</sub>  | -0.8 mA·cm <sup>-2</sup><br>at -0.3 V <sub>SCE</sub> | 11        |
| Mo glas/Cu <sub>2</sub> ZnSnS <sub>4</sub> /CdS/In <sub>2</sub> S <sub>3</sub> /Pt       | 0.2 M Na <sub>2</sub> HPO <sub>4</sub> /NaH <sub>2</sub> PO <sub>4</sub> ; pH=6.5          | 0.8 V <sub>RHE</sub>  | -11.1 mA·cm <sup>-2</sup><br>at 0 V <sub>RHE</sub>   | 12        |
| FTO/CuFeO <sub>2</sub>                                                                   | 1 M NaOH; pH=13.5                                                                          | 0.98 V <sub>RHE</sub> | -0.9 mA·cm <sup>-2</sup><br>at 0.4 V <sub>RHE</sub>  | 13        |
| FTO/Mg-CuBi <sub>2</sub> O <sub>4</sub>                                                  | KB <sub>i</sub> (KOH: 0.2 M; H <sub>3</sub> BO <sub>3</sub> : 0.4 M); pH=9.2               | 1.15 V <sub>RHE</sub> | -0.2 mA·cm <sup>-2</sup><br>at 0.7 V <sub>RHE</sub>  | This work |

## References

1. X. Zhu, Z. Guan, P. Wang, Q. Zhang, Y. Dai, B. Huang, *Chinese J. Catal.*, 2018, **39**, 1704-1710.
2. C. Ma, D. -K. Ma, W. Yu, W. Chen, S. Huang, *Appl. Surf. Sci.*, 2019, **481**, 661-668.
3. R. Gottesman, I. Levine, M. Schleuning, R. Irani, D. Abou-Ras, T. Dittrich, D. Friedrich, R. Krol, *Adv. Energy Mater.*, 2021, **11**, 2003474.
4. S. Wei, C. Wang, X. Long, T. Wang, P. Wang, M. Zhang, S. Li, J. Ma, J. Jin, L. Wu, *Nanoscale*, 2020, **12**, 15193-15200.
5. S. Pulipaka, N. Boni, G. Ummethala, P. Meduri, *J. Catal.*, 2020, **387**, 17-27.
6. S. A. Monny, L. Zhang, Z. Wang, B. Luo, M. Konarova, A. Du, L. Wang, *J. Mater. Chem. A*, 2020, **8**, 2498-2504.
7. S. P. Berglund, F. F. Abdi, P. Bogdanoff, A. Chemseddine, D. Friedrich, R. van de Krol, *Chem. Mater.*, 2016, **28**, 4231-4242.
8. C. -Y. Lin, S. -Y. Lin, M. -C. Tsai, C. -H. Wu, *Sustain. Energy Fuels*, 2020, **4**, 625-632.
9. J. D. Benck, S. C. Lee, K. D. Fong, J. Kibsgaard, R. Sinclair, T.F. Jaramillo, *Adv. Energy Mater.*, 2014, **4**, 1400739.
10. L. Pan, J. H. Kim, M. T. Mayer, M. -K. Son, A. Ummadisingu, J.S. Lee, A. Hagfeldt, J. Luo, M. Grätzel, *Nat. Catal.*, 2018, **1**, 412-420.
11. X. Guo, P. Diao, D. Xu, S. Huang, Y. Yang, T. Jin, Q. Wu, M. Xiang, M. Zhang, *Int. J. Hydrogen Energy*, 2014, **39**, 7686-7696.
12. X. Wen, W. Luo, Z. Guan, W. Huang, Z. Zou, *Nano Energy*, 2017, **41**, 18-26.
13. C. G. Read, Y. Park, K. S. Choi, *J. Phys. Chem. Lett.*, 2012, **3**, 1872-1876.
